# Supplementary material for: The Onset of Subtalar Joint Monoarthritis in a Patient with Rheumatoid Arthritis
Source: MDPI journal article supplement (doi:10.3390/diagnostics12102311), 2022-09-25
Supplement: s1 [file s1]

*Case Report*

# The Onset of Subtalar Joint Monoarthritis in a Patient with Rheumatoid Arthritis

Hiroki Wakabayashi <sup>\*,†</sup>, Kenta Nakata <sup>†</sup>, Akinobu Nishimura <sup>†</sup>, Masahiro Hasegawa and Akihiro Sudo

Department of Orthopedic Surgery, Mie University Graduate School of Medicine, Tsu 514-8507, Japan

\* Correspondence: whiroki@clin.medic.mie-u.ac.jp; Tel.: +81-59-231-5022

† These authors contributed equally to this work.

## Supplementary Materials

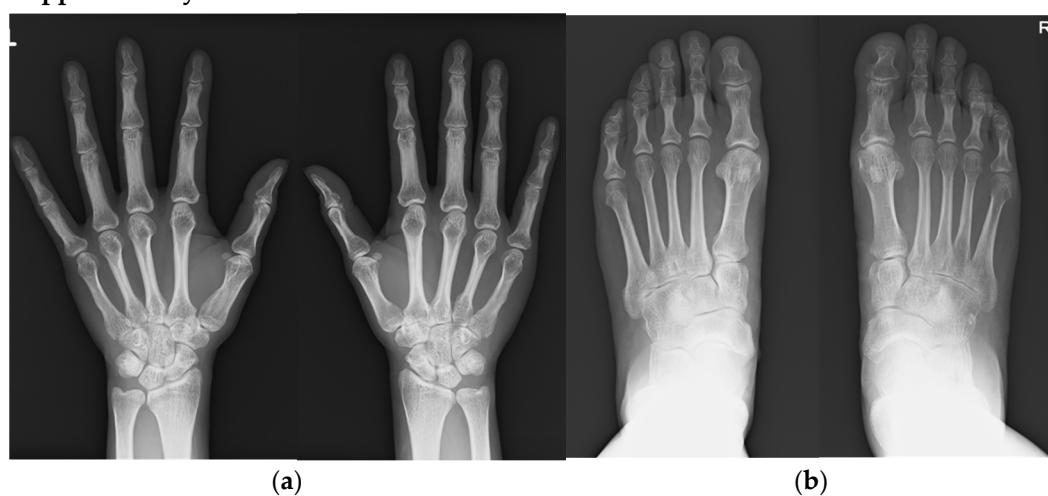

**Figure S1.** The plain radiographs of her hands (a) and foot (b).
